# Supplementary material for: Comparison of Fatty Acid Contents and MMP-1 Inhibitory Effects of the Two Antarctic Fish, Notothenia rossii and Champsocephalus gunnari
Source: MDPI journal article supplement (doi:10.3390/molecules27144554), 2022-07-17
Supplement: s1 [file s1]

## Supplementary Material

### Comparison of Fatty Acid Contents and MMP-1 Inhibitory Effects of the Two Antarctic Fish, *Notothenia rossii* and *Champscephalus gunnari*

Seulah Lee <sup>1,2</sup>, Man Hyung Koo <sup>3</sup>, Dong-Won Han <sup>1</sup>, Il-Chan Kim <sup>1</sup>, Jun Hyuck Lee <sup>3,4</sup>, Jeong-Hoon Kim <sup>1</sup>, Razia Sultana <sup>5</sup>, Sun Yeou Kim <sup>6</sup>, Ui Joung Youn <sup>1,4,\*</sup> and Jin-Hyoung Kim <sup>1,4,\*</sup>

<sup>1</sup> Division of Polar Life Sciences, Korea Polar Research Institute, Incheon 21990, Korea

<sup>2</sup> Seoul School of Integrated Sciences & Technologies (aSSIST), Seoul 03767, Korea

<sup>3</sup> Research Unit of Cryogenic Novel Material, Korea Polar Research Institute, Incheon 21990, Korea

<sup>4</sup> Polar Science, University of Science & Technology, Incheon 21990, Korea

<sup>5</sup> Department of Pharmacy, Jagannath University, Dhaka-1100, Bangladesh

<sup>6</sup> College of Pharmacy, Gachon University, 191 Hambakmoero, Yeonsu-gu, Incheon, 21936, Korea

\* Co-correspondence:

Ui Joung Youn, E-mail: [ujyoun@kopri.re.kr](mailto:ujyoun@kopri.re.kr)

Jin-Hyoung Kim, E-mail: [kimjh@kopri.re.kr](mailto:kimjh@kopri.re.kr)

## List of Electronic Supplementary Material

**Figure S1.** GC-MS chromatograms of extracts of different organs of *C. gunnari* (CG) and *N. rossii* (NR)

**Table S1.** Summary of GC-MS data

**Table S2.** Detailed FA composition (%) of different organs of *N. rossii* and *C. gunnari*

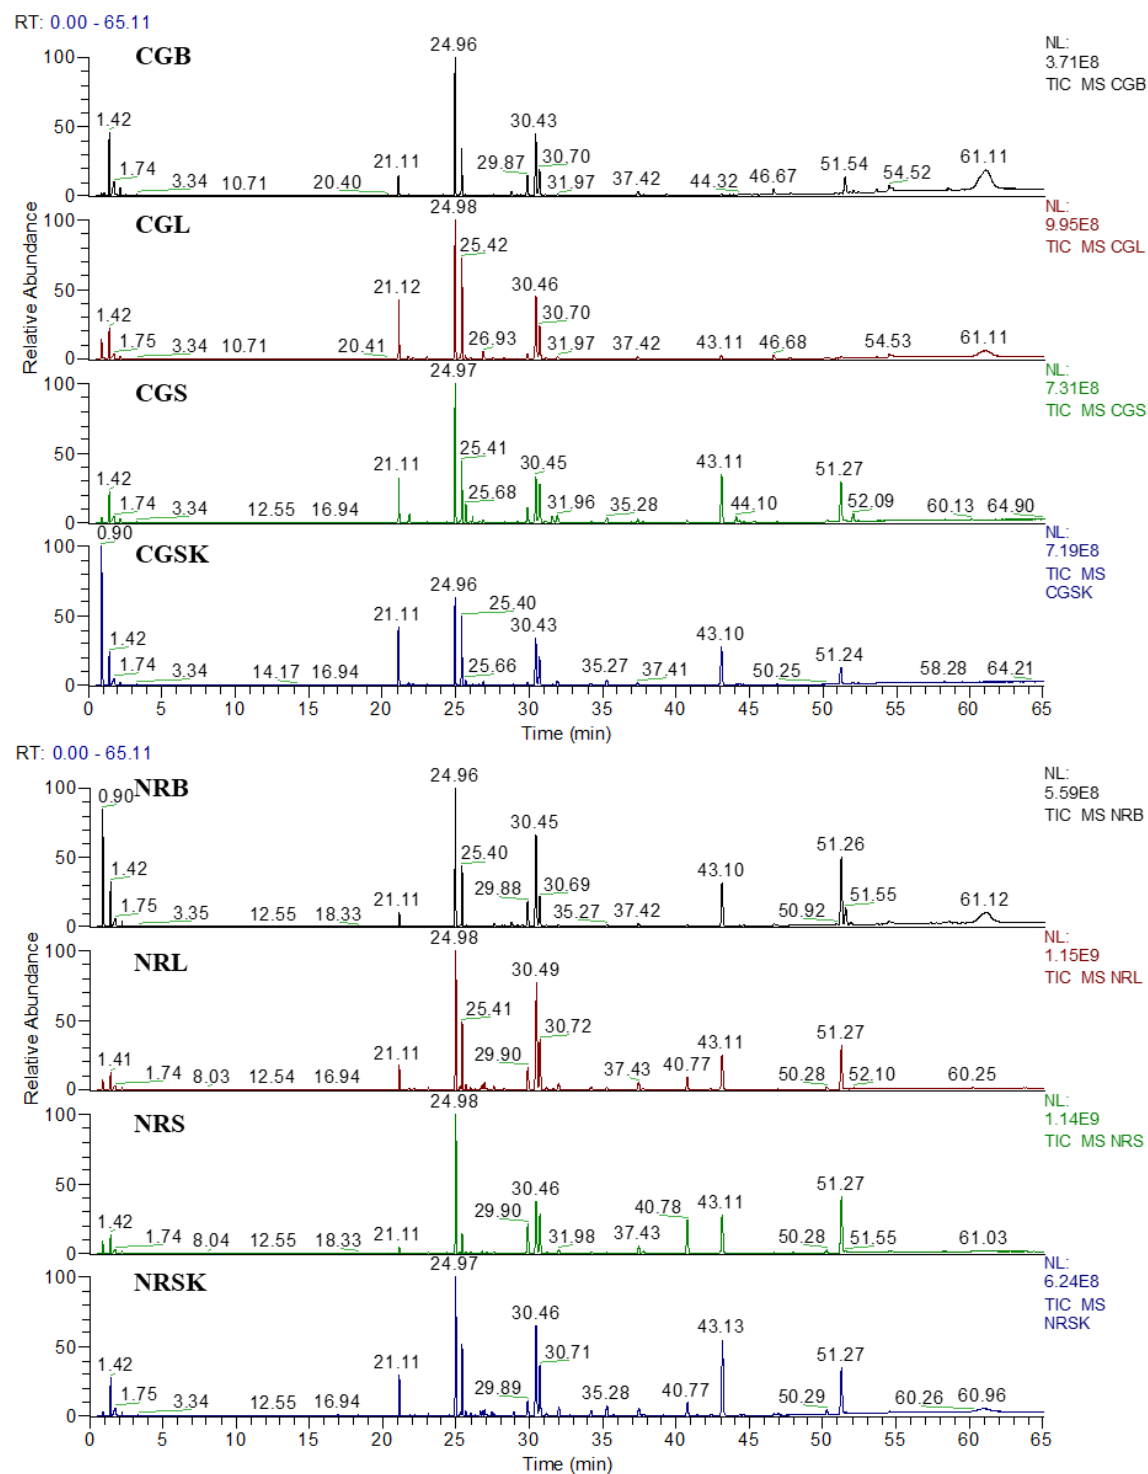

**Figure S1.** GC-MS chromatograms of extracts of different organs of *C. gunnari* (CG) and

*N. rossii* (NR); B=brain, L=liver, S=stomach, SK=skin

**Table S1.** Summary of GC-MS data

| <b>Retention Time (min)</b> | <b>Observed Fatty Acid Methyl Esters (<i>m/z</i>)</b> | <b>Observed Fragmentation Patterns (<i>m/z</i>)</b> | <b>Elemental Composition</b>                   | <b>Identification</b>                                   |
|-----------------------------|-------------------------------------------------------|-----------------------------------------------------|------------------------------------------------|---------------------------------------------------------|
| 21.1                        | 242.23                                                | 74, 87, 143, 199                                    | C <sub>14</sub> H <sub>28</sub> O <sub>2</sub> | Tetradecanoic acid                                      |
| 24.9                        | 270.24                                                | 74, 87, 143, 227                                    | C <sub>16</sub> H <sub>32</sub> O <sub>2</sub> | Palmitic acid                                           |
| 25.4                        | 268.25                                                | 55, 69, 74, 83, 96, 110, 152, 194, 236              | C <sub>16</sub> H <sub>30</sub> O <sub>2</sub> | 9-Hexadecenoic acid                                     |
| 29.8                        | 298.30                                                | 74, 87, 143, 199, 255, 298                          | C <sub>18</sub> H <sub>36</sub> O <sub>2</sub> | Stearic acid                                            |
| 30.4                        | 296.26                                                | 55, 69, 83, 97, 98, 114, 180, 222, 264              | C <sub>18</sub> H <sub>34</sub> O <sub>2</sub> | Oleic acid                                              |
| 31.9                        | 294.31                                                | 67, 81, 95, 96, 97, 123, 150, 222, 264              | C <sub>18</sub> H <sub>32</sub> O <sub>2</sub> | 7,10-Octadecadienoic acid                               |
| 35.2                        | -                                                     | 79, 91, 93, 105, 119, 133, 161, 175, 189, 221       | C <sub>18</sub> H <sub>28</sub> O <sub>2</sub> | Stearidonic acid<br>(6,8,12,15-Octadecatetraenoic acid) |
| 37.4                        | 324.34                                                | 55, 69, 83, 97, 98, 111, 123, 208, 250, 292         | C <sub>20</sub> H <sub>38</sub> O <sub>2</sub> | 11-Eicosenoic acid                                      |
| 40.7                        | -                                                     | 79, 91, 93, 105, 119, 133, 150, 175, 203, 217, 247  | C <sub>20</sub> H <sub>32</sub> O <sub>2</sub> | Arachidonic acid                                        |
| 43.1                        | -                                                     | 79, 91, 93, 119, 133, 147, 161, 201, 215, 247       | C <sub>20</sub> H <sub>30</sub> O <sub>2</sub> | 5,8,11,14,17-Eicosapentaenoic acid                      |
| 50.2                        | -                                                     | 79, 91, 93, 105, 119, 131, 145, 175, 208, 225, 274  | C <sub>22</sub> H <sub>34</sub> O <sub>2</sub> | 7,10,13,16,19-Docosapentaenoic acid                     |
| 51.2                        | -                                                     | 79, 91, 105, 119, 131, 145, 159, 173, 241           | C <sub>22</sub> H <sub>32</sub> O <sub>2</sub> | 4,7,10,13,16,19-Docosahexaenoic acid                    |
| 54.5                        | -                                                     | 55, 69, 83, 97, 98, 111, 133, 151, 180, 222, 264    | C <sub>18</sub> H <sub>34</sub> O <sub>2</sub> | (Z)11-Octadecenoic acid                                 |

---

|      |        |                                 |                 |             |
|------|--------|---------------------------------|-----------------|-------------|
| 61.1 | 386.37 | 105, 145, 213, 275,<br>301, 368 | $C_{27}H_{46}O$ | Cholesterol |
|------|--------|---------------------------------|-----------------|-------------|

---

**Table S2.** Detailed FA composition (%) of different organs of *N. rossii* and *C. gunnari*

|    |         |       |       |      |       |       |      |      |      | PUFA |      |      |      |      |      |               |      |               |       |
|----|---------|-------|-------|------|-------|-------|------|------|------|------|------|------|------|------|------|---------------|------|---------------|-------|
|    |         | SFA   |       |      | MUFA  |       |      |      |      |      |      |      | n-3  |      | n-6  | n-3           |      |               |       |
|    |         | 14:0  | 16:0  | 18:0 | 16:1  | 18:1  | 20:1 | 24:1 | 26:1 | 16:2 | 16:4 | 18:2 | 18:3 | 18:4 | 20:4 | 20:5<br>(EPA) | 22:5 | 22:6<br>(DHA) | Chol  |
| NR | Brain   | 1.31  | 13.8  | 4.93 | 6.71  | 23.38 | 0.77 |      |      |      |      |      |      | 0.48 | 0.64 | 9.75          |      | 21.98         | 16.25 |
|    | Liver   | 2.48  | 19.74 | 4.88 | 9.11  | 36.19 | 1.72 |      |      |      |      | 1.29 | 0.5  | 0.58 | 2.87 | 8.45          | 0.74 | 11.54         |       |
|    | Stomach | 0.71  | 19.63 | 8.17 | 3.3   | 23.95 | 2.64 |      |      |      |      | 1.06 |      |      | 9.79 | 11.28         | 0.85 | 18.63         |       |
|    | Skin    | 3.6   | 13.96 | 2.79 | 9.14  | 25.88 | 1.74 |      |      | 0.57 | 0.74 | 1.85 | 0.97 | 1.96 | 2.83 | 16.19         | 1.13 | 10.74         | 5.89  |
| CG | Brain   | 2.67  | 17.15 | 6.13 | 6.55  | 22.07 | 1.25 | 4.58 | 0.56 |      |      |      |      |      |      |               |      |               | 39.04 |
|    | Liver   | 8.32  | 24.61 | 1.55 | 16.9  | 30.46 | 0.8  |      |      |      |      | 0.95 |      |      |      | 1.34          |      |               | 15.07 |
|    | Stomach | 6.54  | 21.25 | 3.65 | 9.46  | 22.47 | 1.01 |      |      |      |      | 2.15 |      | 1.36 | 0.81 | 15.85         | 0.56 | 14.89         |       |
|    | Skin    | 10.04 | 18.75 | 1.17 | 13.58 | 27.5  | 1.13 |      |      |      |      | 1.93 |      | 2.24 |      | 15.62         |      | 8.04          |       |

NR = *N. rossii*; CG = *C. gunnari*; Chol = cholesterol
